# Supplementary material for: Systems Genetics Analysis of Mouse Chondrocyte Differentiation
Source: PubMed Central journal article supplement (PMC3179327; doi:10.1002/jbmr.271), 2010-10-14
Supplement: jbmr0026-0747-SD8.pdf [file jbmr0026-0747-SD8.pdf]

| Probe set                                 | Gene       | Module in WGCNA | Kin in WGCNA |
|-------------------------------------------|------------|-----------------|--------------|
| scl25652.4_232-S                          | Tmem64     | salmon          | 17.03693371  |
| scl40222.12.1_44-S                        | Slc22a4    | salmon          | 16.40012276  |
| scl012575.1_2-S                           | Cdkn1a     | salmon          | 16.39528538  |
| scl0228608.7_126-S                        | Smox       | salmon          | 15.85678545  |
| scl00209630.2_217-S                       | Frmd4a     | salmon          | 14.89609383  |
| scl00100169.1_330-S                       | Phactr4    | salmon          | 14.85181292  |
| scl015528.3_20-S                          | Hspe1      | salmon          | 14.69251978  |
| scl25869.12_138-S                         | Hrbl       | salmon          | 14.47026869  |
| scl0015516.2_144-S                        | Hspcb      | salmon          | 14.31607453  |
| scl0017936.1_141-S                        | Nab1       | salmon          | 14.1615444   |
| scl013046.9_64-S                          | Cugbp1     | salmon          | 13.91585672  |
| scl000928.1_86-S                          | Hspd1      | salmon          | 13.68627175  |
| scl36963.5_95-S                           | Pou2af1    | salmon          | 13.57138861  |
| scl54620.5_512-S                          | Bhlhb9     | salmon          | 13.18117907  |
| scl015519.1_32-S                          | Hspca      | salmon          | 13.04863819  |
| scl54754.6.1_12-S                         | Iggbp1     | salmon          | 12.74380494  |
| gi_7305154_ref_NM_013556.1__205-S         | Hprt       | salmon          | 12.62001376  |
| scl52490.15_282-S                         | Smbp       | salmon          | 12.51335773  |
| scl066989.6_85-S                          | 2410004N1  | salmon          | 12.49581422  |
| scl015516.6_124-S                         | Hspcb      | salmon          | 12.09307584  |
| scl22141.1.362_235-S                      | Wwtr1      | salmon          | 11.89727524  |
| scl0003360.1_0-S                          | Smox       | salmon          | 11.75918015  |
| scl0001816.1_0-S                          | Eif4a2     | salmon          | 11.50012715  |
| scl44868.8_25-S                           | Gcnt2      | salmon          | 11.42565679  |
| scl54358.13_95-S                          | Syn1       | salmon          | 10.97342916  |
| scl52902.14.1_38-S                        | Stip1      | salmon          | 10.58241196  |
| scl0015516.2_121-S                        | Hspcb      | salmon          | 10.35842317  |
| scl44387.13_320-S                         | Plk2       | salmon          | 10.19910771  |
| scl19176.21_114-S                         | Stk39      | salmon          | 10.1012166   |
| scl37865.9_4-S                            | D10Ucla1   | salmon          | 10.05775173  |
| scl37195.16.1_126-S                       | Bmper      | salmon          | 9.95871652   |
| scl0170750.1_173-S                        | Xpnpep1    | salmon          | 9.264498558  |
| scl24120.2_589-S                          | Cdkn2b     | salmon          | 8.974098456  |
| scl39328.7_317-S                          | Grb2       | salmon          | 8.84565466   |
| rij D130063H01 PX00185M14 AK051669 2725-S | D130063H01 | salmon          | 8.591490436  |
| scl0020964.1_0-S                          | Syn1       | salmon          | 8.343166749  |
| scl0003512.1_8-S                          | Hspa8      | salmon          | 8.150190131  |
| scl019935.5_129-S                         | Mrpl23     | salmon          | 7.989049449  |
| rij A830081L15 PX00155H24 AK044025 2877-S | A830081L15 | salmon          | 6.076359003  |
| rij D030019N20 PX00179B01 AK050786 1930-S | D030019N20 | salmon          | 5.881308863  |
| GI_38080488-S                             | LOC27001   | salmon          | 4.094786825  |

| Module in MMC Pearson | Correlation of Genes in the Module of MMC Pearson |
|-----------------------|---------------------------------------------------|
| 42                    | 0.35155                                           |
| 42                    | 0.35155                                           |
| 42                    | 0.35155                                           |
| 42                    | 0.35155                                           |
| 42                    | 0.35155                                           |
| 42                    | 0.35155                                           |
| 42                    | 0.35155                                           |
| 42                    | 0.35155                                           |
| 67                    | 0                                                 |
| 42                    | 0.35155                                           |
| 42                    | 0.35155                                           |
| 42                    | 0.35155                                           |
| 42                    | 0.35155                                           |
| 44                    | 0.23013                                           |
| 42                    | 0.35155                                           |
| 42                    | 0.35155                                           |
| 42                    | 0.35155                                           |
| 42                    | 0.35155                                           |
| 42                    | 0.35155                                           |
| 75                    | 0                                                 |
| 42                    | 0.35155                                           |
| 42                    | 0.35155                                           |
| 41                    | 0.48805                                           |
| 42                    | 0.35155                                           |
| 42                    | 0.35155                                           |
| 42                    | 0.35155                                           |
| 42                    | 0.35155                                           |
| 44                    | 0.23013                                           |
| 42                    | 0.35155                                           |
| 42                    | 0.35155                                           |
| 42                    | 0.35155                                           |
| 44                    | 0.23013                                           |
| 44                    | 0.23013                                           |
| 44                    | 0.23013                                           |
| 44                    | 0.23013                                           |
| 42                    | 0.35155                                           |
| 42                    | 0.35155                                           |
| 42                    | 0.35155                                           |
| 25                    | 0.94832                                           |
| 25                    | 0.94832                                           |
| 33                    | 0.92433                                           |

| Module in MMC Spearman | Correlation of Genes in the Module of MMC Spearman |
|------------------------|----------------------------------------------------|
| 144                    | 0.46046                                            |
| 144                    | 0.46046                                            |
| 144                    | 0.46046                                            |
| 129                    | 0.52685                                            |
| 140                    | 0.48535                                            |
| 143                    | 0.46582                                            |
| 129                    | 0.52685                                            |
| 140                    | 0.48535                                            |
| 131                    | 0.51675                                            |
| 131                    | 0.51675                                            |
| 131                    | 0.51675                                            |
| 131                    | 0.51675                                            |
| 144                    | 0.46046                                            |
| 140                    | 0.48535                                            |
| 93                     | 0.62294                                            |
| 140                    | 0.48535                                            |
| 144                    | 0.46046                                            |
| 140                    | 0.48535                                            |
| 141                    | 0.4817                                             |
| 131                    | 0.51675                                            |
| 102                    | 0.60416                                            |
| 129                    | 0.52685                                            |
| 131                    | 0.51675                                            |
| 90                     | 0.6297                                             |
| 23                     | 0.82751                                            |
| 138                    | 0.48828                                            |
| 131                    | 0.51675                                            |
| 140                    | 0.48535                                            |
| 114                    | 0.56915                                            |
| 114                    | 0.56915                                            |
| 107                    | 0.59577                                            |
| 131                    | 0.51675                                            |
| 139                    | 0.48602                                            |
| 89                     | 0.63024                                            |
| 131                    | 0.51675                                            |
| 23                     | 0.88343                                            |
| 93                     | 0.62294                                            |
| 144                    | 0.46046                                            |
| 97                     | 0.61539                                            |
| 97                     | 0.61539                                            |
| 97                     | 0.61539                                            |
